# Supplementary material for: Two-dimensional asynchronous spectrum with auxiliary cross peaks in probing intermolecular interactions
Source: Royal Society of Chemistry journal article supplement (doi:10.1039/c5ra16062f), 2015-01-01
Supplement: c5ra16062f1.pdf [file c5ra16062f1.pdf]

## Two-dimensional Asynchronous spectrum with auxiliary cross peaks in probing intermolecular interactions

Xiaopei Li<sup>a, b, c</sup>, Anqi He<sup>b, d</sup>, Kun Huang<sup>a, \*</sup>, Huizhou Liu<sup>a</sup>, Ying Zhao<sup>e</sup>,  
Yongju Wei<sup>f</sup>, Yizhuang Xu<sup>b, d\*</sup>, Isao Noda<sup>b, g</sup>, Jinguang Wu<sup>b</sup>

- <sup>a</sup> Institute of Process Engineering, Chinese Academy of Sciences, 100190, P. R. China
- <sup>b</sup> Beijing National Laboratory for Molecular Sciences, State Key Laboratory for Rare Earth Materials Chemistry and Applications, College of Chemistry and Molecular Engineering, Peking University, Beijing 100871, P. R. China
- <sup>c</sup> Dalian Polytechnic University, Dalian 116034, P. R. China
- <sup>d</sup> Ninhai Doubly Advanced Martial Co, Ltd., Ninhai, 315602, China
- <sup>e</sup> Institute of Chemistry, Chinese Academy of Sciences, 100190, P. R. China
- <sup>f</sup> College of Chemistry and Material Science, Hebei Normal University, Shijiazhuang, 050016, P.R. China
- <sup>g</sup> Department of Materials Science and Engineering, University of Delaware, Newark, Delaware 19716, United States

Corresponding Authors: [xyz@pku.edu.cn](mailto:xyz@pku.edu.cn), [khuang@ipe.ac.cn](mailto:khuang@ipe.ac.cn)

## Appendix

1. The expression of the asynchronous correlation spectrum in the ASAP approach.

$$\Psi(\nu_1, \nu_2) = \frac{1}{n-1} \sum_{i=1}^{25} R_i(\nu_1, \nu_2) \quad (\text{A1})$$

$$\begin{aligned} R_1(\nu_1, \nu_2) &= f_p(\nu_1) f_p(\nu_2) [\mathcal{C}_p^{\text{nit}}]^T \mathbf{N}[\mathcal{C}_p^{\text{nit}}] \\ R_2(\nu_1, \nu_2) &= f_p(\nu_1) f_q(\nu_2) [\mathcal{C}_p^{\text{nit}}]^T \mathbf{N}[\mathcal{C}_q^{\text{nit}}] \\ R_3(\nu_1, \nu_2) &= f_p(\nu_1) [f_u(\nu_2) - f_p(\nu_2)] [\mathcal{C}_p^{\text{nit}}]^T \mathbf{N}[\mathcal{C}_u^{\text{qa}}] \\ R_4(\nu_1, \nu_2) &= f_p(\nu_1) [f_v(\nu_2) - f_q(\nu_2)] [\mathcal{C}_p^{\text{nit}}]^T \mathbf{N}[\mathcal{C}_v^{\text{qa}}] \\ R_5(\nu_1, \nu_2) &= f_p(\nu_1) f_s(\nu_2) [\mathcal{C}_p^{\text{nit}}]^T \mathbf{N}[\mathcal{C}_s^{\text{nit}}] \\ R_6(\nu_1, \nu_2) &= f_q(\nu_1) f_p(\nu_2) [\mathcal{C}_q^{\text{nit}}]^T \mathbf{N}[\mathcal{C}_p^{\text{nit}}] \\ R_7(\nu_1, \nu_2) &= f_q(\nu_1) f_q(\nu_2) [\mathcal{C}_q^{\text{nit}}]^T \mathbf{N}[\mathcal{C}_q^{\text{nit}}] \\ R_8(\nu_1, \nu_2) &= f_q(\nu_1) [f_u(\nu_2) - f_p(\nu_2)] [\mathcal{C}_q^{\text{nit}}]^T \mathbf{N}[\mathcal{C}_u^{\text{qa}}] \\ R_9(\nu_1, \nu_2) &= f_q(\nu_1) [f_v(\nu_2) - f_q(\nu_2)] [\mathcal{C}_q^{\text{nit}}]^T \mathbf{N}[\mathcal{C}_v^{\text{qa}}] \\ R_{10}(\nu_1, \nu_2) &= f_q(\nu_1) f_s(\nu_2) [\mathcal{C}_q^{\text{nit}}]^T \mathbf{N}[\mathcal{C}_s^{\text{nit}}] \\ R_{11}(\nu_1, \nu_2) &= [f_u(\nu_1) - f_p(\nu_1)] f_p(\nu_2) [\mathcal{C}_u^{\text{qa}}]^T \mathbf{N}[\mathcal{C}_p^{\text{nit}}] \\ R_{12}(\nu_1, \nu_2) &= [f_u(\nu_1) - f_p(\nu_1)] f_q(\nu_2) [\mathcal{C}_u^{\text{qa}}]^T \mathbf{N}[\mathcal{C}_q^{\text{nit}}] \\ R_{13}(\nu_1, \nu_2) &= [f_u(\nu_1) - f_p(\nu_1)] [f_u(\nu_2) - f_p(\nu_2)] [\mathcal{C}_u^{\text{qa}}]^T \mathbf{N}[\mathcal{C}_u^{\text{qa}}] \\ R_{14}(\nu_1, \nu_2) &= [f_u(\nu_1) - f_p(\nu_1)] [f_v(\nu_2) - f_q(\nu_2)] [\mathcal{C}_u^{\text{qa}}]^T \mathbf{N}[\mathcal{C}_v^{\text{qa}}] \\ R_{15}(\nu_1, \nu_2) &= [f_u(\nu_1) - f_p(\nu_1)] f_s(\nu_2) [\mathcal{C}_u^{\text{qa}}]^T \mathbf{N}[\mathcal{C}_s^{\text{nit}}] \\ R_{16}(\nu_1, \nu_2) &= [f_v(\nu_1) - f_q(\nu_1)] f_p(\nu_2) [\mathcal{C}_v^{\text{qa}}]^T \mathbf{N}[\mathcal{C}_p^{\text{nit}}] \\ R_{17}(\nu_1, \nu_2) &= [f_v(\nu_1) - f_q(\nu_1)] f_q(\nu_2) [\mathcal{C}_v^{\text{qa}}]^T \mathbf{N}[\mathcal{C}_q^{\text{nit}}] \\ R_{18}(\nu_1, \nu_2) &= [f_v(\nu_1) - f_q(\nu_1)] [f_u(\nu_2) - f_p(\nu_2)] [\mathcal{C}_v^{\text{qa}}]^T \mathbf{N}[\mathcal{C}_u^{\text{qa}}] \\ R_{19}(\nu_1, \nu_2) &= [f_v(\nu_1) - f_q(\nu_1)] [f_v(\nu_2) - f_q(\nu_2)] [\mathcal{C}_v^{\text{qa}}]^T \mathbf{N}[\mathcal{C}_v^{\text{qa}}] \\ R_{20}(\nu_1, \nu_2) &= [f_v(\nu_1) - f_q(\nu_1)] f_s(\nu_2) [\mathcal{C}_v^{\text{qa}}]^T \mathbf{N}[\mathcal{C}_s^{\text{nit}}] \\ R_{21}(\nu_1, \nu_2) &= f_s(\nu_1) f_p(\nu_2) [\mathcal{C}_s^{\text{nit}}]^T \mathbf{N}[\mathcal{C}_p^{\text{nit}}] \\ R_{22}(\nu_1, \nu_2) &= f_s(\nu_1) f_q(\nu_2) [\mathcal{C}_s^{\text{nit}}]^T \mathbf{N}[\mathcal{C}_q^{\text{nit}}] \\ R_{23}(\nu_1, \nu_2) &= f_s(\nu_1) [f_u(\nu_2) - f_p(\nu_2)] [\mathcal{C}_s^{\text{nit}}]^T \mathbf{N}[\mathcal{C}_u^{\text{qa}}] \\ R_{24}(\nu_1, \nu_2) &= f_s(\nu_1) [f_v(\nu_2) - f_q(\nu_2)] [\mathcal{C}_s^{\text{nit}}]^T \mathbf{N}[\mathcal{C}_v^{\text{qa}}] \\ R_{25}(\nu_1, \nu_2) &= f_s(\nu_1) f_s(\nu_2) [\mathcal{C}_s^{\text{nit}}]^T \mathbf{N}[\mathcal{C}_s^{\text{nit}}] \end{aligned}$$

2. In the main text, we pointed out  $R_{21}(\nu_1, \nu_2)$  and  $R_{22}(\nu_1, \nu_2)$  in the ASAP

approach can be removed when the concentration series of S is in a linear relationship with the initial concentration of P and Q simultaneously.

$$aC_S^{i(\text{init})} + bC_Q^{i(\text{init})} = c \quad (\text{A2a})$$

$$mC_S^{i(\text{init})} + hC_P^{i(\text{init})} = d \quad (\text{A2b})$$

where  $a$ ,  $b$ ,  $c$ ,  $m$ ,  $h$  and  $d$  are preset constants.

Eq. A2 also can be expressed by Eq. A3.

$$C_Q^{i(\text{init})} = \frac{c}{b} - \frac{aC_S^{i(\text{init})}}{b} \quad (\text{A3a})$$

$$C_P^{i(\text{init})} = \frac{d}{h} - \frac{mC_S^{i(\text{init})}}{h} \quad (\text{A3b})$$

The expression of dynamic concentration of P, Q and S are given in Eq. A4.

$$\mathcal{C}_Q^{i(\text{init})} = C_Q^{i(\text{init})} - C_Q^{\text{init(av)}} = \frac{c}{b} - \frac{aC_S^{i(\text{init})}}{b} - C_Q^{\text{init(av)}} \quad (\text{A4a})$$

$$\mathcal{C}_P^{i(\text{init})} = C_P^{i(\text{init})} - C_P^{\text{init(av)}} = \frac{d}{h} - \frac{mC_S^{i(\text{init})}}{h} - C_P^{\text{init(av)}} \quad (\text{A4b})$$

$$\mathcal{C}_S^{i(\text{init})} = C_S^{i(\text{init})} - C_S^{\text{init(av)}} \quad (\text{A4c})$$

where  $C_Q^{\text{init(av)}}$ ,  $C_P^{\text{init(av)}}$  and  $C_S^{\text{init(av)}}$  are the average concentration of Q, P and S over  $n$  solutions.

$$C_Q^{\text{init(av)}} = \frac{1}{n} \sum_n^{i=1} C_Q^{i(\text{init})} \quad (\text{A5a})$$

$$C_P^{\text{init(av)}} = \frac{1}{n} \sum_n^{i=1} C_P^{i(\text{init})} \quad (\text{A5b})$$

$$\mathbf{C}_S^{\text{init(av)}} = \frac{1}{n} \sum_n^{i=1} \mathbf{C}_S^{i(\text{init})} \quad (\text{A5c})$$

After combining Eq. A3 to Eq. A5, Eq. A4 changes into the following expressions.

$$\mathcal{C}_Q^{i(\text{init})} = C_Q^{i(\text{init})} - C_Q^{\text{init(av)}} = \frac{c}{b} - \frac{a C_S^{i(\text{init})}}{b} - C_Q^{\text{init(av)}} = \frac{c}{b} - \frac{a C_S^{i(\text{init})}}{b} - \frac{c}{b} - \frac{a C_S^{\text{init(av)}}}{b} = -\frac{a \mathcal{C}_S^{i(\text{init})}}{b} \quad (\text{A6a})$$

$$\mathcal{C}_P^{i(\text{init})} = C_P^{i(\text{init})} - C_P^{\text{init(av)}} = \frac{d}{h} - \frac{m C_S^{i(\text{init})}}{h} - C_P^{\text{init(av)}} = \frac{d}{h} - \frac{m C_S^{i(\text{init})}}{h} - \frac{d}{h} - \frac{m C_S^{\text{init(av)}}}{h} = -\frac{m \mathcal{C}_S^{i(\text{init})}}{h} \quad (\text{A6b})$$

Thus:

$$\mathcal{C}_Q^{\text{init}} = -\frac{a}{b} \mathcal{C}_S^{\text{init}} \quad (\text{A7a})$$

$$\mathcal{C}_P^{\text{init}} = -\frac{m}{h} \mathcal{C}_S^{\text{init}} \quad (\text{A7b})$$

Therefore:

$$\mathbf{R}_{21}(\nu_1, \nu_2) = f_p(\nu_1) f_s(\nu_2) [\mathcal{C}_P^{\text{init}}]^T \mathbf{N} [\mathcal{C}_S^{\text{init}}] = f_p(\nu_1) f_s(\nu_2) [-\frac{m}{h} \mathcal{C}_S^{\text{init}}]^T \mathbf{N} [\mathcal{C}_S^{\text{init}}] = -\frac{m}{h} f_p(\nu_1) f_s(\nu_2) [\mathcal{C}_S^{\text{init}}]^T \mathbf{N} [\mathcal{C}_S^{\text{init}}] \quad (\text{A8})$$

a)

$$\mathbf{R}_{22}(\nu_1, \nu_2) = f_q(\nu_1) f_s(\nu_2) [\mathcal{C}_Q^{\text{init}}]^T \mathbf{N} [\mathcal{C}_S^{\text{init}}] = f_q(\nu_1) f_s(\nu_2) [-\frac{a}{b} \mathcal{C}_S^{\text{init}}]^T \mathbf{N} [\mathcal{C}_S^{\text{init}}] = -\frac{a}{b} f_q(\nu_1) f_s(\nu_2) [\mathcal{C}_S^{\text{init}}]^T \mathbf{N} [\mathcal{C}_S^{\text{init}}] \quad (\text{A8})$$

b)

Based on the property of Hilbert-Noda transformation matrix  $\mathbf{N}$  listed in Eq. A9, the value of  $\mathbf{R}_{21}$  and  $\mathbf{R}_{22}$  is zero.

$$\mathbf{U}^T \mathbf{B} \mathbf{U} = \mathbf{0} \quad (\text{A9})$$

$$\mathbf{R}_{21}(\nu_1, \nu_2) = \mathbf{0} \quad (\text{A10a})$$

$$\mathbf{R}_{22}(\nu_1, \nu_2) = \mathbf{0} \quad (\text{A10b})$$
