# Supplementary material for: Two-dimensional asynchronous spectrum with auxiliary cross peaks in probing intermolecular interactions
Source: Royal Society of Chemistry journal article supplement (doi:10.1039/c5ra16062f), 2015-01-01
Supplement: c5ra16062f2.pdf [file c5ra16062f2.pdf]

## Two-dimensional Asynchronous spectrum with auxiliary cross peaks in probing intermolecular interactions

Xiaopei Li <sup>a, b, c</sup>, Anqi He <sup>b, d</sup>, Kun Huang <sup>a, \*</sup>, Huizhou Liu <sup>a</sup>, Ying Zhao <sup>e</sup>,  
Yongju Wei <sup>f</sup>, Yizhuang Xu <sup>b, d, \*</sup>, Isao Noda <sup>b, g</sup>, Jinguang Wu <sup>b</sup>

- <sup>a</sup> Institute of Process Engineering, Chinese Academy of Sciences, 100190, P. R. China
- <sup>b</sup> Beijing National Laboratory for Molecular Sciences, State Key Laboratory for Rare Earth Materials Chemistry and Applications, College of Chemistry and Molecular Engineering, Peking University, Beijing 100871, P. R. China
- <sup>c</sup> **Dalian Polytechnic University, Dalian 116034, P. R. China**
- <sup>d</sup> Ninhai Doubly Advanced Martial Co, Ltd., Ninhai, 315602, China
- <sup>e</sup> Institute of Chemistry, Chinese Academy of Sciences, 100190, P. R. China
- <sup>f</sup> College of Chemistry and Material Science, Hebei Normal University, Shijiazhuang, 050016, P.R. China
- <sup>g</sup> Department of Materials Science and Engineering, University of Delaware, Newark, Delaware 19716, United States

Corresponding Authors: [xyz@pku.edu.cn](mailto:xyz@pku.edu.cn), [khuang@ipe.ac.cn](mailto:khuang@ipe.ac.cn)

## Supporting Information

**TABLE S1** Concentrations of benzo-15-crown-5 in the methanol solutions

| Index of the solutions | $C_{BC}$ (mol.L <sup>-1</sup> ) |
|------------------------|---------------------------------|
| 1                      | 0.00                            |
| 2                      | 0.11                            |
| 3                      | 0.22                            |
| 4                      | 0.30                            |

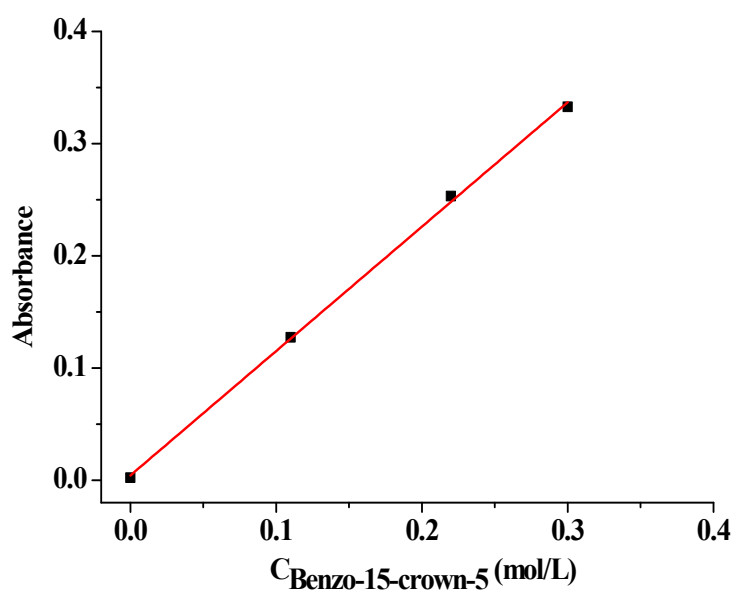

**Figure S1** The absorbance of the vibration band of skeleton of the aromatic ring of benzo-15-crown-5 as a function of the concentration of benzo-15-crown-5, Good linear relationship between the absorbance and concentration of benzo-15-crown-5 was observed
